# Supplementary material for: Positive Imagery-Based Cognitive Bias Modification as a Web-Based Treatment Tool for Depressed Adults: A Randomized Controlled Trial
Source: PubMed Central journal article supplement (PMC4359210; doi:10.1177/2167702614560746), 2015-01
Supplement: Holmes_Blackwell_et_al_Supp_Tables.pdf [file Holmes_Blackwell_et_al_Supp_Tables.pdf]

## Supplementary Materials Available Online

Supplementary Table 1. Results from the mixed model analyses including estimated marginal means and effect sizes for a) BDI-II (primary outcome), b) anhedonia, c) subgroup with fewer than five depressive episodes.

|                            |                                | a) BDI-II in full sample |                     |                    |                    |                     |
|----------------------------|--------------------------------|--------------------------|---------------------|--------------------|--------------------|---------------------|
|                            |                                | Baseline                 | Post-treatment      | 1-month            | 3-month            | 6-month             |
| Intention to treat         |                                |                          |                     |                    |                    |                     |
| Imagery<br>( <i>n</i> =76) | <i>M</i>                       | 29.35                    | 22.16               | 19.30              | 19.41              | 16.84               |
|                            | <i>SD</i>                      | 8.63                     | 10.86               | 12.88              | 13.07              | 12.25               |
|                            | $d_{\text{within}}$ [95% CIs]  |                          | 0.83 [0.54, 1.13]   | 1.16 [0.85, 1.48]  | 1.15 [0.81, 1.49]  | 1.45 [1.07, 1.83]   |
| Control<br>( <i>n</i> =74) | <i>M</i>                       | 30.12                    | 22.58               | 20.95              | 20.76              | 17.35               |
|                            | <i>SD</i>                      | 10.17                    | 11.03               | 13.02              | 13.32              | 12.69               |
|                            | $d_{\text{within}}$ [95% CIs]  |                          | 0.74 [0.46, 1.03]   | 0.90 [0.61, 1.20]  | 0.92 [0.60, 1.24]  | 1.26 [0.89, 1.62]   |
| Comparison                 | <i>t</i> ( <i>df</i> )         |                          | 0.21 (141.11)       | 0.45 (143.96)      | 0.27 (133.72)      | 0.13 (138.28)       |
|                            | <i>p</i>                       |                          | .83                 | .66                | .79                | .90                 |
|                            | $d_{\text{between}}$ [95% CIs] |                          | -0.04 [-0.36, 0.29] | 0.07 [-0.25, 0.40] | 0.05 [-0.29, 0.38] | -0.02 [-0.35, 0.31] |
|                            |                                |                          |                     |                    |                    |                     |
| Per protocol               |                                |                          |                     |                    |                    |                     |
| Imagery<br>( <i>n</i> =59) | <i>M</i>                       | 29.17                    | 21.02               | 18.53              | 18.83              | 16.02               |
|                            | <i>SD</i>                      | 8.33                     | 10.66               | 12.12              | 12.85              | 11.61               |
|                            | $d_{\text{within}}$ [95% CIs]  |                          | 0.98 [0.62, 1.34]   | 1.28 [0.88, 1.67]  | 1.24 [0.85, 1.64]  | 1.58 [1.13, 2.03]   |
| Control<br>( <i>n</i> =56) | <i>M</i>                       | 29.53                    | 23.25               | 21.08              | 20.98              | 17.57               |
|                            | <i>SD</i>                      | 9.74                     | 10.74               | 12.25              | 13.01              | 11.72               |
|                            | $d_{\text{within}}$ [95% CIs]  |                          | 0.65 [0.34, 0.95]   | 0.87 [0.55, 1.19]  | 0.88 [0.54, 1.22]  | 1.23 [0.83, 1.63]   |
| Comparison                 | <i>t</i> ( <i>df</i> )         |                          | 1.02 (113)          | 1.05 (113)         | 0.78 (113)         | 0.54 (113)          |
|                            | <i>p</i>                       |                          | .31                 | .30                | .44                | .59                 |
|                            | $d_{\text{between}}$ [95% CIs] |                          | 0.19 [-0.17, 0.56]  | 0.20 [-0.17, 0.56] | 0.15 [-0.22, 0.51] | 0.10 [-0.26, 0.47]  |
|                            |                                |                          |                     |                    |                    |                     |

|                            |                                | b) Anhedonia                                                    |                    |                    |                    |                    |
|----------------------------|--------------------------------|-----------------------------------------------------------------|--------------------|--------------------|--------------------|--------------------|
|                            |                                | Baseline                                                        | Post-treatment     | 1-month            | 3-month            | 6-month            |
| Imagery<br>( <i>n</i> =59) | <i>M</i>                       | 3.38                                                            | 2.29               | 2.10               | 1.97               | 1.49               |
|                            | <i>SD</i>                      | 1.27                                                            | 1.46               | 1.68               | 1.80               | 1.53               |
|                            | $d_{\text{within}}$ [95% CIs]  |                                                                 | 0.85 [0.53, 1.18]  | 1.00 [0.61, 1.39]  | 1.11 [0.69, 1.52]  | 1.48 [1.03, 1.93]  |
| Control<br>( <i>n</i> =56) | <i>M</i>                       | 3.46                                                            | 2.91               | 2.59               | 2.83               | 2.16               |
|                            | <i>SD</i>                      | 1.34                                                            | 1.46               | 1.69               | 1.80               | 1.53               |
|                            | $d_{\text{within}}$ [95% CIs]  |                                                                 | 0.41 [0.15, 0.67]  | 0.65 [0.36, 0.93]  | 0.47 [0.17, 0.77]  | 0.97 [0.61, 1.33]  |
| Comparison                 | <i>t</i> ( <i>df</i> )         |                                                                 | 2.17 (113.18)      | 1.32 (110.06)      | 2.20 (112.56)      | 1.83 (112.57)      |
|                            | <i>p</i>                       |                                                                 | .03                | .19                | .03                | .07                |
|                            | $d_{\text{between}}$ [95% CIs] |                                                                 | 0.41 [0.04, 0.78]  | 0.25 [-0.12, 0.62] | 0.42 [0.04, 0.79]  | 0.34 [-0.02, 0.71] |
|                            |                                |                                                                 |                    |                    |                    |                    |
|                            |                                | c) BDI-II: subgroup with fewer than five episodes of depression |                    |                    |                    |                    |
|                            |                                | Baseline                                                        | Post-treatment     | 1-month            | 3-month            | 6-month            |
| Imagery<br>( <i>n</i> =31) | <i>M</i>                       | 28.89                                                           | 19.82              | 17.50              | 17.85              | 17.44              |
|                            | <i>SD</i>                      | 8.36                                                            | 9.80               | 9.54               | 10.57              | 9.88               |
|                            | $d_{\text{within}}$ [95% CIs]  |                                                                 | 1.08 [0.52, 1.65]  | 1.36 [0.76, 1.96]  | 1.32 [0.72, 1.92]  | 1.37 [0.75, 1.99]  |
| Control<br>( <i>n</i> =24) | <i>M</i>                       | 27.26                                                           | 25.09              | 22.47              | 21.22              | 17.09              |
|                            | <i>SD</i>                      | 9.13                                                            | 10.84              | 10.55              | 11.73              | 10.93              |
|                            | $d_{\text{within}}$ [95% CIs]  |                                                                 | 0.24 [-0.08, 0.56] | 0.52 [0.18, 0.87]  | 0.66 [0.24, 1.08]  | 1.11 [0.50, 1.72]  |
| Comparison                 | <i>t</i> ( <i>df</i> )         |                                                                 | 2.66 (53)          | 2.66 (53)          | 1.70 (53)          | 0.42 (53)          |
|                            | <i>p</i>                       |                                                                 | .01                | .01                | .09                | .68                |
|                            | $d_{\text{between}}$ [95% CIs] |                                                                 | 0.73 [0.19, 1.28]  | 0.73 [0.18, 1.28]  | 0.47 [-0.07, 1.00] | 0.12 [-0.41, 0.64] |
|                            |                                |                                                                 |                    |                    |                    |                    |

*Note.* Means, standard deviations, effect sizes and confidence intervals are all derived from the mixed model analysis, with the exception of pre-treatment standard deviation, which is presented as the raw score.  $d_{\text{within}}$  = within-group effect size for change from baseline to the specified time-point. The *t* and *p* values are for the comparison between conditions of the change from baseline to the specified timepoints (estimates of fixed effects from the mixed model).  $d_{\text{between}}$  = between-group effect size, comparing change from baseline to the specified timepoint between conditions. Positive values of  $d_{\text{between}}$  favour the imagery condition, negative values of  $d_{\text{between}}$  favour the control condition.

Supplementary Table 2. Results from the mixed model analyses including estimated marginal means and effect sizes for a) Prospective Imagery Test – Positive Vividness b) Scrambled Sentences Test – Negativity.

|                            |                                       | a) Prospective Imagery Test – Positive Vividness |                    |                    |                    |                    |
|----------------------------|---------------------------------------|--------------------------------------------------|--------------------|--------------------|--------------------|--------------------|
|                            |                                       | Baseline                                         | Post-treatment     | 1-month            | 3-month            | 6-month            |
| Intention to treat         |                                       |                                                  |                    |                    |                    |                    |
| Imagery<br>( <i>n</i> =76) | <i>M</i>                              | 2.81                                             | 3.20               | 3.07               | 3.05               | 3.07               |
|                            | <i>SD</i>                             | 0.88                                             | 0.87               | 0.91               | 0.87               | 0.86               |
|                            | <i>d</i> <sub>within</sub> [95% CIs]  |                                                  | 0.45 [0.23, 0.66]  | 0.30 [0.07, 0.53]  | 0.27 [0.06, 0.49]  | 0.30 [0.06, 0.54]  |
| Control<br>( <i>n</i> =74) | <i>M</i>                              | 2.86                                             | 3.03               | 2.88               | 2.87               | 2.82               |
|                            | <i>SD</i>                             | 0.81                                             | 0.86               | 0.90               | 0.89               | 0.87               |
|                            | <i>d</i> <sub>within</sub> [95% CIs]  |                                                  | 0.21 [0.03, 0.40]  | 0.03 [-0.18, 0.23] | 0.01 [-0.20, 0.23] | 0.05 [-0.18, 0.28] |
| Comparison                 | <i>t</i> ( <i>df</i> )                |                                                  | 1.86 (142.57)      | 1.81 (141.72)      | 1.80 (142.92)      | 2.17 (142.52)      |
|                            | <i>p</i>                              |                                                  | .07                | .07                | .07                | .03                |
|                            | <i>d</i> <sub>between</sub> [95% CIs] |                                                  | 0.31 [-0.02, 0.64] | 0.30 [-0.02, 0.63] | 0.30 [-0.03, 0.63] | 0.36 [0.03, 0.69]  |
|                            |                                       |                                                  |                    |                    |                    |                    |
| Per protocol               |                                       |                                                  |                    |                    |                    |                    |
| Imagery<br>( <i>n</i> =59) | <i>M</i>                              | 2.79                                             | 3.16               | 3.06               | 3.03               | 3.01               |
|                            | <i>SD</i>                             | 0.90                                             | 0.87               | 0.91               | 0.86               | 0.88               |
|                            | <i>d</i> <sub>within</sub> [95% CIs]  |                                                  | 0.41 [0.17, 0.64]  | 0.29 [0.04, 0.55]  | 0.26 [0.04, 0.49]  | 0.24 [-0.03, 0.50] |
| Control<br>( <i>n</i> =56) | <i>M</i>                              | 2.81                                             | 2.98               | 2.84               | 2.81               | 2.79               |
|                            | <i>SD</i>                             | 0.79                                             | 0.86               | 0.90               | 0.86               | 0.87               |
|                            | <i>d</i> <sub>within</sub> [95% CIs]  |                                                  | 0.22 [-0.01, 0.44] | 0.04 [-0.21, 0.28] | 0.00 [-0.25, 0.25] | 0.02 [-0.24, 0.28] |
| Comparison                 | <i>t</i> ( <i>df</i> )                |                                                  | 1.49 (113)         | 1.58 (113)         | 1.72 (113)         | 1.48 (113)         |
|                            | <i>p</i>                              |                                                  | .14                | .12                | .09                | .14                |
|                            | <i>d</i> <sub>between</sub> [95% CIs] |                                                  | 0.28 [-0.09, 0.65] | 0.30 [-0.07, 0.67] | 0.32 [-0.04, 0.69] | 0.28 [-0.09, 0.65] |
|                            |                                       |                                                  |                    |                    |                    |                    |

|                            |                                | b) Scrambled Sentences – Negativity score |                     |
|----------------------------|--------------------------------|-------------------------------------------|---------------------|
|                            |                                | Baseline                                  | Post-treatment      |
| Intention to treat         |                                |                                           |                     |
| Imagery<br>( <i>n</i> =76) | <i>M</i>                       | 0.57                                      | 0.46                |
|                            | <i>SD</i>                      | 0.23                                      | 0.25                |
|                            | $d_{\text{within}}$ [95% CIs]  |                                           | 0.45 [0.21, 0.69]   |
| Control<br>( <i>n</i> =74) | <i>M</i>                       | 0.60                                      | 0.48                |
|                            | <i>SD</i>                      | 0.24                                      | 0.25                |
|                            | $d_{\text{within}}$ [95% CIs]  |                                           | 0.48 [0.24, 0.72]   |
| Comparison                 | <i>t</i> (df)                  |                                           | 0.29 (133.49)       |
|                            | <i>p</i>                       |                                           | .77                 |
|                            | $d_{\text{between}}$ [95% CIs] |                                           | -0.05 [-0.39, 0.29] |
|                            |                                |                                           |                     |
| Per protocol               |                                |                                           |                     |
| Imagery<br>( <i>n</i> =63) | <i>M</i>                       | 0.58                                      | 0.47                |
|                            | <i>SD</i>                      | 0.23                                      | 0.25                |
|                            | $d_{\text{within}}$ [95% CIs]  |                                           | 0.45 [0.21, 0.70]   |
| Control<br>( <i>n</i> =62) | <i>M</i>                       | 0.58                                      | 0.47                |
|                            | <i>SD</i>                      | 0.25                                      | 0.24                |
|                            | $d_{\text{within}}$ [95% CIs]  |                                           | 0.44 [0.20, 0.69]   |
| Comparison                 | <i>t</i> (df)                  |                                           | 0.14 (123.00)       |
|                            | <i>p</i>                       |                                           | .89                 |
|                            | $d_{\text{between}}$ [95% CIs] |                                           | -0.02 [-0.38, 0.33] |
|                            |                                |                                           |                     |

*Note.* Means, standard deviations, effect sizes and confidence intervals are all derived from the mixed model analysis, with the exception of pre-treatment standard deviation, which is presented as the raw score.  $d_{\text{within}}$  = within-group effect size for change from baseline to the specified time-point. The *t* and *p* values are for the comparison between conditions of the change from baseline to the specified timepoints (estimates of fixed effects from the mixed model).  $d_{\text{between}}$  = between-group effect size, comparing change from baseline to the specified timepoint between conditions. Positive values of  $d_{\text{between}}$  favour the imagery condition, negative values of  $d_{\text{between}}$  favour the control condition.
